# Supplementary material for: Influence of Varying Dietary ω6 to ω3 Fatty Acid Ratios on the Hepatic Transcriptome, and Association with Phenotypic Traits (Growth, Somatic Indices, and Tissue Lipid Composition), in Atlantic Salmon (Salmo salar)
Source: MDPI journal article supplement (doi:10.3390/biology10070578), 2021-06-24
Supplement: s1 [file s1]

## Supplementary Material

**Table S1.** Formulation and nutrient composition (%) of experimental diets fed to Atlantic salmon. This diet information was published in Katan et al. 2019. However, it is included here as this information is pertinent to the current study as well.

| Ingredient (%) <sup>a</sup>              | High $\omega$ 3 | Balanced       | High $\omega$ 6 |
|------------------------------------------|-----------------|----------------|-----------------|
| Marine protein <sup>b</sup>              | 26.7            | 26.7           | 26.7            |
| Plant protein <sup>c</sup>               | 44.6            | 44.6           | 44.6            |
| Additives <sup>d</sup>                   | 2.6             | 2.6            | 2.6             |
| Fish oil                                 | 4.8             | 4.8            | 4.8             |
| Linseed oil                              | 16.7            | 8.3            | 0               |
| Soy oil                                  | 0               | 9.8            | 19.6            |
| Palm oil                                 | 4.6             | 3.2            | 1.7             |
| Total (%)                                | 100             | 100            | 100             |
| Digestible energy (MJ Kg <sup>-1</sup> ) | 20.4            | 20.4           | 20.4            |
| Digestible protein (g Kg <sup>-1</sup> ) | 421             | 421            | 421             |
| Dry matter (%) <sup>e</sup>              | 94.8 $\pm$ 0.1  | 94.8 $\pm$ 0.1 | 94.8 $\pm$ 0.1  |
| Ash (%) <sup>e</sup>                     | 6.2 $\pm$ 0.04  | 6.0 $\pm$ 0.3  | 6.2 $\pm$ 0.2   |

<sup>a</sup> All ingredients were sourced from Cargill Innovation stocks.

<sup>b</sup> Marine protein is comprised of fish meal.

<sup>c</sup> Plant protein concentrate is a proprietary blend of soy, corn and wheat.

<sup>d</sup> Additives are proprietary mineral, vitamin mix and amino acids. Mineral and vitamin composition is proprietary information to Cargill Innovation.

<sup>e</sup> Analysed as % of wet weight (n = 3).

**Table S2.** Lipid and FA composition (%) of experimental diets<sup>a</sup> fed to Atlantic salmon. This diet information was published in Katan et al. 2019. However, it is included here as this information is pertinent to the current study as well.

|                                                 | High $\omega$ 3 | Balanced | High $\omega$ 6 |
|-------------------------------------------------|-----------------|----------|-----------------|
| Lipid class composition (% of total lipid)      |                 |          |                 |
| TAG <sup>b</sup>                                | 80.0            | 82.9     | 76.9            |
| Sterol                                          | 3.1             | 3.4      | 1.9             |
| AMPL <sup>c</sup>                               | 4.5             | 1.6      | 6.4             |
| Phospholipid                                    | 2.6             | 3.3      | 2.7             |
| Total lipids (mg g <sup>-1</sup> wet weight)    | 189             | 215      | 206             |
| FA composition (% of total FAs)                 |                 |          |                 |
| 14:0                                            | 1.7             | 1.5      | 1.6             |
| 16:0                                            | 13.7            | 13.0     | 13.2            |
| 16:1 $\omega$ 7                                 | 1.7             | 1.7      | 1.7             |
| 18:0                                            | 2.9             | 3.0      | 3.0             |
| 18:1 $\omega$ 7                                 | 1.0             | 1.2      | 1.4             |
| 18:1 $\omega$ 9                                 | 20.1            | 19.6     | 19.4            |
| <b>18:2<math>\omega</math>6 (LNA)</b>           | 12.7            | 24.6     | 36.2            |
| <b>18:3<math>\omega</math>3 (ALA)</b>           | 29.8            | 18.9     | 6.4             |
| 20:1 $\omega$ 9                                 | 2.5             | 2.5      | 2.6             |
| 20:4 $\omega$ 6 (ARA)                           | 0.1             | 0.1      | 0.1             |
| 20:5 $\omega$ 3 (EPA)                           | 2.6             | 2.6      | 2.6             |
| 22:6 $\omega$ 3 (DHA)                           | 3.2             | 3.2      | 3.2             |
| $\Sigma$ SFA <sup>d</sup>                       | 19.1            | 18.5     | 19.0            |
| $\Sigma$ MUFA <sup>e</sup>                      | 29.8            | 29.5     | 29.8            |
| $\Sigma$ PUFA <sup>f</sup>                      | 50.9            | 51.9     | 51.0            |
| <b><math>\Sigma</math> <math>\omega</math>3</b> | 37.1            | 26.2     | 13.7            |
| <b><math>\Sigma</math> <math>\omega</math>6</b> | 13.0            | 24.9     | 36.5            |
| $\omega$ 6: $\omega$ 3                          | 0.4             | 0.9      | 2.7             |
| DHA/EPA                                         | 1.3             | 1.2      | 1.3             |
| EPA/ARA                                         | 20.7            | 22.9     | 20.5            |
| EPA+DHA (% of wet weight) <sup>g</sup>          | 1.0             | 1.1      | 1.3             |

<sup>a</sup> Mean (n=3). <sup>b</sup> Triacylglycerol. <sup>c</sup> Acetone mobile polar lipid. <sup>d</sup> Total saturated fatty acids. <sup>e</sup> Total monounsaturated fatty acids. <sup>f</sup> Total polyunsaturated fatty acids. <sup>g</sup> EPA+DHA analysed as % of dietary wet weight. Fatty acids that showed the largest range among diets are bolded.

**Table S3.** Paralogues of genes involved in the qPCR study, and their identity (%) over the aligned nucleotide regions.

| Transcript name (symbol)                                                       | GenBank<br>Accession no. | Aligned<br>region (bp) | Identity (%) | E-value  |
|--------------------------------------------------------------------------------|--------------------------|------------------------|--------------|----------|
| Serine protease HTRA1 precursor a ( <i>htra1a</i> )                            | NM001141717              | 591                    | 91           | 0        |
| Serine protease HTRA1 precursor b ( <i>htra1b</i> )                            | EG831192                 |                        |              |          |
| Eukaryotic translation initiation factor 4B 1 ( <i>eif4b1</i> )                | BT072661                 | 756                    | 82           | 0        |
| Eukaryotic translation initiation factor 4B 2 ( <i>eif4b2</i> )                | DY739566                 |                        |              |          |
| Leukocyte cell-derived chemotaxin 2 precursor a ( <i>lect2a</i> )              | BT059281                 | 531                    | 88           | 0        |
| Leukocyte cell-derived chemotaxin 2 precursor b ( <i>lect2b</i> )              | DV106130                 |                        |              |          |
| Helicase with zinc finger domain 2 a ( <i>helz2a</i> , alias <i>pric285a</i> ) | BT072427                 | 828                    | 67           | 1.00e-60 |
| Helicase with zinc finger domain 2 b ( <i>helz2b</i> , alias <i>pric285b</i> ) | EG928625                 |                        |              |          |

|                    |       | 1   | 50                                                          | 50  |
|--------------------|-------|-----|-------------------------------------------------------------|-----|
| htrala_NM001141717 | (1)   | 1   | CAACAAAGCTCATTTTAGTGAAAAGCGTCTGACATTTATTTGCAAATGTA          | 50  |
| htralb_EG831192    | (1)   | 1   | -----                                                       |     |
|                    |       | 51  |                                                             | 100 |
| htrala_NM001141717 | (51)  | 1   | TGTAACGTTTATTTATGCAGATCAAACATATTTTGTAGCAAGTCGTAAA           |     |
| htralb_EG831192    | (1)   | 1   | -----                                                       |     |
|                    |       | 101 |                                                             | 150 |
| htrala_NM001141717 | (101) | 1   | GTTTTAAGAGTCGTTTTTTTTGGCAACTTTGTACCTTTTAGATACTTTA           |     |
| htralb_EG831192    | (1)   | 1   | -----                                                       |     |
|                    |       | 151 |                                                             | 200 |
| htrala_NM001141717 | (151) | 1   | ATATTTAACAATGTTTTGGTGCCTCTCTGCGCAACTTTTATTCTTGCTC           |     |
| htralb_EG831192    | (1)   | 1   | -----                                                       |     |
|                    |       | 201 |                                                             | 250 |
| htrala_NM001141717 | (201) | 1   | CTTTAGTTTGCAGTCAAGAGCCAAGCGATATGTCATCGGCTGTCCAGAT           |     |
| htralb_EG831192    | (1)   | 1   | -----                                                       |     |
|                    |       | 251 |                                                             | 300 |
| htrala_NM001141717 | (251) | 1   | AAATGTGACAAATTTCTATGTCCCCGATCCCTGCGGACTGTTGGCCGG            |     |
| htralb_EG831192    | (1)   | 1   | -----                                                       |     |
|                    |       | 301 |                                                             | 350 |
| htrala_NM001141717 | (301) | 1   | CGACATCCTTGACCAATGCGACTGCTGTCCGGTCTGTGCGCACGGAGAAG          |     |
| htralb_EG831192    | (1)   | 1   | -----                                                       |     |
|                    |       | 351 |                                                             | 400 |
| htrala_NM001141717 | (351) | 1   | GTGAGGTGTGCGGCGGCACGGGGAGACTAGGGGACCCGGAGTGCGGAGAG          |     |
| htralb_EG831192    | (1)   | 1   | -----                                                       |     |
|                    |       | 401 |                                                             | 450 |
| htrala_NM001141717 | (401) | 1   | GGCATGGACTGCTCGATATCGGACGGAATTGGGGTGTCCGCCACAGTAAG          |     |
| htralb_EG831192    | (1)   | 1   | -----                                                       |     |
|                    |       | 451 |                                                             | 500 |
| htrala_NM001141717 | (451) | 1   | GCGTCGGGGCAAAAACGGTGTGTGCGTCTGCAAAGTTGCGGACCCGGTGT          |     |
| htralb_EG831192    | (1)   | 1   | -----                                                       |     |
|                    |       | 501 |                                                             | 550 |
| htrala_NM001141717 | (501) | 1   | GCGGCAGTGACGGGGTGTCTACCGAAACATCTGCGAACTGAAGAGATTG           |     |
| htralb_EG831192    | (1)   | 1   | -----                                                       |     |
|                    |       | 551 |                                                             | 600 |
| htrala_NM001141717 | (551) | 1   | AGTAACCGGGCTCTGAAGCTTCAGCAGCCACCGGTCATCTTCATACAGAG          |     |
| htralb_EG831192    | (1)   | 1   | -----                                                       |     |
|                    |       | 601 |                                                             | 650 |
| htrala_NM001141717 | (601) | 1   | AGGAACCTGTAGCAAAGGCCAGGAGAATCCAGACAGTCTGCGCCACAGAT          |     |
| htralb_EG831192    | (1)   | 1   | -----                                                       |     |
|                    |       | 651 |                                                             | 700 |
| htrala_NM001141717 | (651) | 1   | ATAACTTCATC <b>GCTGATGTGGTGGAGGAGAT</b> CGCTCCCGCTGTGGTTCAT |     |
| htralb_EG831192    | (1)   | 1   | -----                                                       |     |
|                    |       | 701 |                                                             | 750 |
| htrala_NM001141717 | (701) | 1   | ATTGAACTTTACCGCAAGATGGTGTCTCTAAGCGTGAGGTGGCGGTGGC           |     |
| htralb_EG831192    | (1)   | 1   | -----                                                       |     |
|                    |       | 751 |                                                             | 800 |
| htrala_NM001141717 | (751) | 1   | CAGCGGGTCTGGCTTCGTG <b>GTGTCAGAGGACGGCTTGA</b> TTGTGACCAACG |     |
| htralb_EG831192    | (1)   | 1   | -----                                                       |     |
|                    |       | 801 |                                                             | 850 |
| htrala_NM001141717 | (801) | 1   | CCCACGTGGTGGCCAATAAGCACCGGGTGAAGGTGGAGCTGAAGAGTGGC          |     |
| htralb_EG831192    | (1)   | 1   | -----                                                       |     |
|                    |       | 851 |                                                             | 900 |
| htrala_NM001141717 | (851) | 1   | GCCACCTTCGACGCCAAGATCACAGACGTGGACGAGAAGGCAGACATTGC          |     |
| htralb_EG831192    | (1)   | 1   | -----                                                       |     |
|                    |       | 901 |                                                             | 950 |

|                    |        |                                                    |                                            |
|--------------------|--------|----------------------------------------------------|--------------------------------------------|
| htrala_NM001141717 | (901)  | CCTCATCAAGATCGACACCCCGATGAAACTGCCGGTGCTGCTGCTGGGTC |                                            |
| htralb_EG831192    | (1)    | -----                                              |                                            |
|                    |        | 951                                                | 1000                                       |
| htrala_NM001141717 | (951)  | GTTTCAGCTGACCTGAGGCCTGGT                           | GAGTTTGTGTGGCCATCGGCAGCCCC                 |
| htralb_EG831192    | (1)    | -----G                                             | GGG                                        |
|                    |        | 1001                                               | 1050                                       |
| htrala_NM001141717 | (1001) | TTCTCCCTGCAGAACACGGTCACCACAGGTATCGTCAGCACCACCCA    | AAG                                        |
| htralb_EG831192    | (32)   | TTCTCCCTGCAGAACACGGTCACCACAGGTATCGTCAGCACCACCCA    | GAG                                        |
|                    |        | 1051                                               | 1100                                       |
| htrala_NM001141717 | (1051) | AGGAGGCAAGGAGCTTGGCCTGAGGAACTCTGATATGGAA           | TACATCCAGA                                 |
| htralb_EG831192    | (82)   | AGGAGGCAAGGAGCTGGCCTGAGGAACTCTGATATGGAA            | TACATCCAGA                                 |
|                    |        | 1101                                               | 1150                                       |
| htrala_NM001141717 | (1101) | CGGACGCTATCATCAACGAAGGAAGTGTAGATCTACCATCTGAT       | CATCCC                                     |
| htralb_EG831192    | (132)  | CGGACGCTATCATCAAC                                  | T-----                                     |
|                    |        | 1151                                               | 1200                                       |
| htrala_NM001141717 | (1151) | TTTAACCTGAATGCTGTTCCCTTTTCAGT                      | ATGGGAACTCTGGCGGACCCCT                     |
| htralb_EG831192    | (150)  | -----                                              | ATGGGAACTCTGGCGGACCCCT                     |
|                    |        | 1201                                               | 1250                                       |
| htrala_NM001141717 | (1201) | GGTCAATCTGGACGGAGAGGTGATTGGGATCAACACACTGAAGGTGACAG |                                            |
| htralb_EG831192    | (172)  | GGTCAATCTGGATGGAGAGGTGATTGGGATCAACACACTGAAGGTGACAG |                                            |
|                    |        | 1251                                               | 1300                                       |
| htrala_NM001141717 | (1251) | CAGGAATCTCCTTCGCCATCCCCTCAGACAAGATCCGTCAGTTC       | TGGCA                                      |
| htralb_EG831192    | (222)  | CAGGAATCTCCTTCGCCATCCCCTCAGACAAGATCCGTCAGTTC       | TGGCA                                      |
|                    |        | 1301                                               | 1350                                       |
| htrala_NM001141717 | (1301) | GAGTCCCA                                           | CGGCAGACAATCTAAAGGTA                       |
| htralb_EG831192    | (272)  | GAGTCCCATGACAGG                                    | CAATCTAAAGGTA                              |
|                    |        | 1351                                               | 1400                                       |
| htrala_NM001141717 | (1331) | -TTATTACCAAAGAAGAA                                 | TATATCGGTGTGAGGATGATGACTCTCACTA            |
| htralb_EG831192    | (322)  | ATTATCAACAAGTAAGAA                                 | TATATCGGTGTGAGGATGATGACTCTCACAC            |
|                    |        | 1401                                               | 1450                                       |
| htrala_NM001141717 | (1380) | CAACGCTTGCAAAGGAGCTGAAGGAGAGA                      | ACATCAGACTTCCCTGATGTT                      |
| htralb_EG831192    | (372)  | CAATGCTTGCAAAGGAGCTGAAGGAGAGA                      | CAATCAGACTTCCCTGATGTT                      |
|                    |        | 1451                                               | 1500                                       |
| htrala_NM001141717 | (1430) | ACCTCAGGGGCATATGT                                  | CATCGAGGTCATCCCCAAAAACACCAGCTGAGAC         |
| htralb_EG831192    | (422)  | ACCTCAGGGGCATATGT                                  | AATCGAGGTCATCCCCAAAAACACCAGCTGAGAC         |
|                    |        | 1501                                               | 1550                                       |
| htrala_NM001141717 | (1480) | AGGTGGCCTGCAGGAGAGTGA                              | CGTCATAATCACCATCAACAGCCAGCGAA              |
| htralb_EG831192    | (472)  | AGGTGGCCTGCAGGAGAGTGA                              | TGTCATAATCACCATCAACAGCCAGCGAA              |
|                    |        | 1551                                               | 1600                                       |
| htrala_NM001141717 | (1530) | TCACCTCGGCCAGTGA                                   | TGTCAGCAGCTCATCAAGAGGGA                    |
| htralb_EG831192    | (522)  | TCACCTCAGCCAGTGA                                   | CGTCAGCAGCTCATCAAGAGGGA                    |
|                    |        | 1601                                               | 1650                                       |
| htrala_NM001141717 | (1580) | CGAATGGTGGTCCGGCGGGGGAACGAGGAC                     | ATCATGCTCACCCTCGTCCC                       |
| htralb_EG831192    | (572)  | CGCATGGTGGTCCGGCGGGGGAACGAGGAC                     | ATCATGCTCACCCTCGTCCC                       |
|                    |        | 1651                                               | 1700                                       |
| htrala_NM001141717 | (1630) | CAGGACATTGACCCTTGACCTCTCAGCAACCACGAGCTGGTTCTCAGTG  |                                            |
| htralb_EG831192    | (622)  | AGAGGACATTGACCCTTGACCTCTCAGCAACCACGAGCTGGTTCTCAGTG |                                            |
|                    |        | 1701                                               | 1750                                       |
| htrala_NM001141717 | (1680) | TTTAAAA                                            | CACGGAC-TTAAACCGGTTGTGTCTGGATCCACACCCTAC   |
| htralb_EG831192    | (672)  | TTGAAAA                                            | TACGGACCTTAAACCGG--GTGTGTCTGGAGCCACACCCTAC |
|                    |        | 1751                                               | 1800                                       |
| htrala_NM001141717 | (1729) | CATAGAACCTGTAACCTACGGGTG                           | ---CTCTGCTCTCAGTGAA--ACT                   |
| htralb_EG831192    | (720)  | CTTAGAACCTGTAACCTAC                                | TAGTGCTCTCCCCACTCTCAAACTACA                |
|                    |        | 1801                                               | 1850                                       |
| htrala_NM001141717 | (1773) | GATTAT                                             | TGT                                        |
| htralb_EG831192    | (770)  | GAGGTC                                             | TGT                                        |
|                    |        | 1851                                               | 1900                                       |

```

htrala_NM001141717 (1823) ATCAGATAGAAAAGTGGGTGTCACAGATTACCGTAGTTTTGTAGTTGTTT
htralb_EG831192 (816) -----
                        1901                                     1950
htrala_NM001141717 (1873) TTGTTGCTGTTGATATTATGTTTTTTTTTTTATTGTATTTAATTGCATTT
htralb_EG831192 (816) -----
                        1951                                     2000
htrala_NM001141717 (1923) CTCTTGATACGTTTTGACGACAATTTACAGAGGGAATAAAAAAGATTTTG
htralb_EG831192 (816) -----
                        2001                                     2027
htrala_NM001141717 (1973) AAAAAAAAAAAAAAAAAAAAAAAAAAGA
htralb_EG831192 (816) -----

```

**Figure S1.** Alignment of the nucleotide sequences of *htrala* (GenBank accession number NM\_001141717) and *htralb* (GenBank accession number EG831192). Conserved regions are highlighted in yellow. Alignments were performed using AlignX (Vector NTI Advance 11). Forward primers are bolded and underlined, whereas reverse primers are bolded without an underline.

|                 |       |                                                      |      |
|-----------------|-------|------------------------------------------------------|------|
| eif4b1_BT072661 | (1)   | ATAAGAAGGGGAAGACCCTGACCCTCACTGACTTCCTGGCAGAGGACAAT   |      |
| eif4b2_DY739566 | (1)   | -----                                                |      |
|                 |       | 51                                                   | 100  |
| eif4b1_BT072661 | (51)  | GGGAGTGGAGGCAATGCTCCACCACCGCAACCCAGCTACGCCAAGTCCAC   |      |
| eif4b2_DY739566 | (1)   | -----                                                |      |
|                 |       | 101                                                  | 150  |
| eif4b1_BT072661 | (101) | CAGCTGGGCCGACGAGACGGATGACCTGGAGGGAGATGTGTCCACCTCCT   |      |
| eif4b2_DY739566 | (1)   | -----                                                |      |
|                 |       | 151                                                  | 200  |
| eif4b1_BT072661 | (151) | GGCACTCAGGGGAGGACAGTTACCGGGCCCCGGCCATAGATCGCAACATC   |      |
| eif4b2_DY739566 | (1)   | -----                                                |      |
|                 |       | 201                                                  | 250  |
| eif4b1_BT072661 | (201) | CTGCCCCACGGCGCCACGGTCGGCCCCGCGAGCCCAATGTGGACCGGTCACG |      |
| eif4b2_DY739566 | (1)   | -----                                                |      |
|                 |       | 251                                                  | 300  |
| eif4b1_BT072661 | (251) | CCTCCCCCGCAGCCCCCTACACCGCCTTCCTGGGCAACCTGCCCTACG     |      |
| eif4b2_DY739566 | (1)   | -----                                                |      |
|                 |       | 301                                                  | 350  |
| eif4b1_BT072661 | (301) | ACGTCTCCGAGGAATCTATCATGGACTTCTTCGGGGCCTAGCGATCAGT    |      |
| eif4b2_DY739566 | (1)   | -----                                                |      |
|                 |       | 351                                                  | 400  |
| eif4b1_BT072661 | (351) | GCTGTGCGCTTGCCACGGGAGCCCAGTAACCCAGAGAGGCTGAAGGGCTT   |      |
| eif4b2_DY739566 | (1)   | -----                                                |      |
|                 |       | 401                                                  | 450  |
| eif4b1_BT072661 | (401) | TGGCTACGCAGAGTTTGATGATGTGGACTCCCTCCTGAGGGCGCTGACTC   |      |
| eif4b2_DY739566 | (1)   | -----                                                |      |
|                 |       | 451                                                  | 500  |
| eif4b1_BT072661 | (451) | TCAATGAGGAGAACCTGGGAAACCGCAGGATCCGGGTGGATATTGCAGAT   |      |
| eif4b2_DY739566 | (1)   | -----                                                |      |
|                 |       | 501                                                  | 550  |
| eif4b1_BT072661 | (501) | CAGTCCAACGACAAGGAGGGGAGAGATAATGGCCAGATGGGTGGACGGGA   |      |
| eif4b2_DY739566 | (1)   | -----                                                |      |
|                 |       | 551                                                  | 600  |
| eif4b1_BT072661 | (551) | CAGGATGGGCCGTATGGGAGACATGGGGGGCCCCGACAAGACAGACAGTG   |      |
| eif4b2_DY739566 | (1)   | -----                                                |      |
|                 |       | 601                                                  | 650  |
| eif4b1_BT072661 | (601) | ACGACTGGAGGGCCCGGCCACTGCTGACGCTGATGACGGACCCCCAAAG    |      |
| eif4b2_DY739566 | (1)   | -----                                                |      |
|                 |       | 651                                                  | 700  |
| eif4b1_BT072661 | (651) | AGAGAGGAATCCACTTTTCGGGTACGCGACCGCTATGGAGACCGTGACGG   |      |
| eif4b2_DY739566 | (1)   | -----                                                |      |
|                 |       | 701                                                  | 750  |
| eif4b1_BT072661 | (701) | GCTGAGACGGGACAACGACCGCGATTGCGCGACCGGGACCGCGGA        |      |
| eif4b2_DY739566 | (1)   | -----CGCGCTTCGGGTCAACGCGAC                           |      |
|                 |       | 751                                                  | 800  |
| eif4b1_BT072661 | (750) | TTTGGCGCGACCGGGACCGCGGATTTGCGCGGACCGGACCGCGGATT      |      |
| eif4b2_DY739566 | (21)  | CGCTACGGAGACCGTGA---CGGGCTGCGAAGGACAAACGACCGCGCTT    |      |
|                 |       | 801                                                  | 850  |
| eif4b1_BT072661 | (800) | TGGCGGCGACCGGGACGGCGGGAGAGACCGCGGTTTCGGTGGCAGAGACC   |      |
| eif4b2_DY739566 | (68)  | CGCGGCGACCGGGAC-----CGCGGCTTCGGCGGCAGAGACC           |      |
|                 |       | 851                                                  | 900  |
| eif4b1_BT072661 | (850) | GCTATGATGACCGGGGAGGTGAGAGCGGAGCCTTTGGCTCCCGCAGGGAC   |      |
| eif4b2_DY739566 | (106) | GCTATGACGACCGGGGAGGTGAGAACCGGAGCCTTTGGCTCCCGCAGGGAT  |      |
|                 |       | 901                                                  | 950  |
| eif4b1_BT072661 | (900) | CGGGATGATGGCGGGCGACGTGCCTTGGCAGTGGCTACCGCCGTGATGA    |      |
| eif4b2_DY739566 | (156) | AGGGATGACGGCGGGCGACGTGCCTTGGCAGTGGCTACCGCCGTGACGA    |      |
|                 |       | 951                                                  | 1000 |

|                 |        |                                                           |                      |      |
|-----------------|--------|-----------------------------------------------------------|----------------------|------|
| eif4b1_BT072661 | (950)  | TGAC-----GGGGGTGGTGGTGCCGCTACGGGAA                        | CGGGATC              |      |
| eif4b2_DY739566 | (206)  | TGACTATCAGAGTGGCGGAGGTGGCGGTAGCCGCTATGGGGCC               | CGGGATC              |      |
|                 |        | 1001                                                      |                      | 1050 |
| eif4b1_BT072661 | (988)  | GCTACGGCGCGGACAGAGAGGACCGATATGAGAGGC                      | GAGGA-GAGAG-         |      |
| eif4b2_DY739566 | (256)  | GCTATGGCGGAGACCGGAGGGCCGGTATGAGAGGCAGGACGAGGGCGT          |                      |      |
|                 |        | 1051                                                      |                      | 1100 |
| eif4b1_BT072661 | (1036) | GAGGTGAG-GGTGGTCCACGCAGAGACCCAAGCTGGTCTCTGAAGCC           | ACG                  |      |
| eif4b2_DY739566 | (306)  | GAGGAGAGAGGTGGTCCGATCGAAGGCCCAAGTGGTCTCTGAAGCC            | GCG                  |      |
|                 |        | 1101                                                      |                      | 1150 |
| eif4b1_BT072661 | (1085) | CAGCAGCCCAAGGAGGAGAGCAGGCCCGCAGCGGTGGTGC                  | GGGAGCTG             |      |
| eif4b2_DY739566 | (356)  | CAGCATGGCCAAGGAGGAGCAGCAGGCCGCAGCGGTGGG                   | GCG-----TA           |      |
|                 |        | 1151                                                      |                      | 1200 |
| eif4b1_BT072661 | (1135) | CCCCAGCTGCTCCAGCGACTGCCCCCAGCTCCGGCCGTGCCTCCATCTTC        |                      |      |
| eif4b2_DY739566 | (400)  | C-----TCCGGCAGCCGCCCGCAGCTCTGGTCTGAGCCTCCATCTTC           |                      |      |
|                 |        | 1201                                                      |                      | 1250 |
| eif4b1_BT072661 | (1185) | GGAGCAGCCCAAGCCCCGTGGACACTGCAGCCAAGGAGCGGGAGGTGGAGGA      |                      |      |
| eif4b2_DY739566 | (441)  | GGAGCGGCCAAGCCCCGTGGACACAGCGCTAAGGAGCGGGAGGTGGAGGA        |                      |      |
|                 |        | 1251                                                      |                      | 1300 |
| eif4b1_BT072661 | (1235) | GAAACTCCAGAGGCAGCTGGAAGAGGACAAGTCCA                       | GGGGCTTGATAGGA       |      |
| eif4b2_DY739566 | (491)  | GAAAGTCCAGAGGCAGCTGGAAGAGGACAAGTCCA                       | AGGGCTTGATAGGA       |      |
|                 |        | 1301                                                      |                      | 1350 |
| eif4b1_BT072661 | (1285) | AACCCGCGGATAGAGACAGGGACCCAAGTTGGAGGAGTGAGGAGCCACCT        |                      |      |
| eif4b2_DY739566 | (541)  | AACCTCGCGACAGAGACAGGGACCCAAGCTGGAGGAGTGAGGAGCCACCT        |                      |      |
|                 |        | 1351                                                      |                      | 1400 |
| eif4b1_BT072661 | (1335) | TCTGAGCGACCTGCTACACGCTCCCGCACAGGAAGTGAGTCATCACA           | GAC                  |      |
| eif4b2_DY739566 | (591)  | TCTGAGC-----GGTCCCGCACAGGAAGTGAGTCATCACATCC               |                      |      |
|                 |        | 1401                                                      |                      | 1450 |
| eif4b1_BT072661 | (1385) | GGAAGTACATCTGGAGGAAGAGTCTCGCGGCAGAGAGAGCGAGCGAT           |                      |      |
| eif4b2_DY739566 | (629)  | AGGAAGTACCTCTGGAGGAGAGCTCA                                | CGGCAGAGAGAGCGAGCGCT |      |
|                 |        | 1451                                                      |                      | 1500 |
| eif4b1_BT072661 | (1435) | CGGTGAGAAAGAAGTATTCAGTGGTAAGGAGGATGACCCCTCCCTCTCCC        |                      |      |
| eif4b2_DY739566 | (679)  | CAGTGAGAAAGAAGTATTCAGCGGTAAGGAGGACGACCCCTCCCTCTCCC        |                      |      |
|                 |        | 1501                                                      |                      | 1550 |
| eif4b1_BT072661 | (1485) | GGAGCTCGCCCCCTTCCGCCAACTCTTCCACATCTTCCTCCAAGGAGCC         |                      |      |
| eif4b2_DY739566 | (729)  | GGGTCTCGCCCCCTTCCGCCAACTCTTCCACCTTCCTCCAAG-----           |                      |      |
|                 |        | 1551                                                      |                      | 1600 |
| eif4b1_BT072661 | (1535) | CCTCAAGGTGATGCCCCGACCACCACCAAGGAGAAATGCCTGGGCCAAGC        |                      |      |
| eif4b2_DY739566 | (774)  | -----                                                     |                      |      |
|                 |        | 1601                                                      |                      | 1650 |
| eif4b1_BT072661 | (1585) | GCCCTGCGGTGAGCGCAGGGTCCACCCCTGTCTCCCCAGTGACGCGGCA         |                      |      |
| eif4b2_DY739566 | (774)  | -----                                                     |                      |      |
|                 |        | 1651                                                      |                      | 1700 |
| eif4b1_BT072661 | (1635) | TGTCCCAAAGTGAAGTCTGAGCTCAAGTTCTGCAGATGAAAGAGGATCTGGAAGGGA |                      |      |
| eif4b2_DY739566 | (774)  | -----                                                     |                      |      |
|                 |        | 1701                                                      |                      | 1750 |
| eif4b1_BT072661 | (1685) | AATTCAGCTCAGCCAGTAAATACGCCGCTTTGCTAATGGACAGCGAGCAA        |                      |      |
| eif4b2_DY739566 | (774)  | -----                                                     |                      |      |
|                 |        | 1751                                                      |                      | 1800 |
| eif4b1_BT072661 | (1735) | GGAGACGACGCAGAGGACAGCGTAGAATAAAGCGAGAGCGGGGGAGTGAA        |                      |      |
| eif4b2_DY739566 | (774)  | -----                                                     |                      |      |
|                 |        | 1801                                                      |                      | 1850 |
| eif4b1_BT072661 | (1785) | AAGAAGATCCAGCCAATGAAAGAATCTCACATTAAATATGAAAGTCTCCT        |                      |      |
| eif4b2_DY739566 | (774)  | -----                                                     |                      |      |
|                 |        | 1851                                                      |                      | 1900 |
| eif4b1_BT072661 | (1835) | CACCTGGTGTAGAGGCACCTGGGAGGTCATCACTTCTACCTACTTTCTCTT       |                      |      |
| eif4b2_DY739566 | (774)  | -----                                                     |                      |      |
|                 |        | 1901                                                      |                      | 1950 |



```

eif4b1_BT072661 (1885) ACTCGTAACCTCCTTCCCCTTTTCAGGACTTTTCAGTTTCTAAAAAGAA
eif4b2_DY739566 (774) -----
                        1951                                     2000
eif4b1_BT072661 (1935) TAGTCATATACTGACTTGTTTTAAAATGGAAAAGGAAAGGAATAGTCGAC
eif4b2_DY739566 (774) -----
                        2001                                     2050
eif4b1_BT072661 (1985) ACAAGAAAATATGGAAAATTGAATTAATTGTAATAAATAAAAAAAGTGGG
eif4b2_DY739566 (774) -----
                        2051                                     2100
eif4b1_BT072661 (2035) GTAAAAACAAATTGTTTACATTTGTGATGGTATGAGTTGGGCTCCATCCT
eif4b2_DY739566 (774) -----
                        2101                                     2150
eif4b1_BT072661 (2085) TCTCCCCAGTGGAAAAGGATGAAGAGTTGGTTACTGGATGCTTGCTTGTC
eif4b2_DY739566 (774) -----
                        2151                                     2200
eif4b1_BT072661 (2135) AGCCTGACCTATTAAATCTCATGTGCAGTTAAAAAAAAAAAAAAAAAAAA
eif4b2_DY739566 (774) -----
                        2201
eif4b1_BT072661 (2185) AAAAAAAGA
eif4b2_DY739566 (774) -----

```

**Figure S2.** Alignment of the nucleotide sequences of *eif4b1* (GenBank accession number BT072661) and *eif4b2* (accession number DY739566). Conserved regions are highlighted in yellow. Alignments were performed using AlignX (Vector NTI Advance 11). Forward primers are bolded and underlined, whereas reverse primers are bolded without an underline.

|                 |       |                                                     |      |
|-----------------|-------|-----------------------------------------------------|------|
| lect2a_BT059281 | (1)   | -CAAGACTTTCTTGTAAGTTTTCCTTGA-GTGAAAGCATCATCTAAGG    |      |
| lect2b_DV106130 | (1)   | GCAAGACTTTCTTGCAAGTTTTCCTTGAAGCGAAAGCATCATCTCAGG    |      |
|                 |       | 51                                                  | 100  |
| lect2a_BT059281 | (49)  | CTTTACCATGAGGACTGCTGTTCTTTGTTTACTGTGGTGCTCATAGCTG   |      |
| lect2b_DV106130 | (51)  | CTTCAACATGAAGACAGCTATTCTTCTGCTTACTGTAGTCTTATGCTG    |      |
|                 |       | 101                                                 | 150  |
| lect2a_BT059281 | (99)  | TGTTGT CAGAGTGCAGATGGTCAAGTTTGGTCAGCTGTGCAGCGGCAAC  |      |
| lect2b_DV106130 | (101) | TGTTGTC CAGAGTGTGAGATGGCAAGTTTGGTCAGCTGTGTAGCGGAAAT |      |
|                 |       | 151                                                 | 200  |
| lect2a_BT059281 | (149) | TCCAGTAACAGGAGGAGGACAGGGGACAGATGGGGACAAGGACACTACGG  |      |
| lect2b_DV106130 | (151) | TCCAGTAACAGGAGGAGGACAGGGGACAACTGGGGACAAGGACAGTACGG  |      |
|                 |       | 201                                                 | 250  |
| lect2a_BT059281 | (199) | CGCACGCAGAGGAACCGTGAGCATCAGGGCCTGGACATTGTGTGTAAATG  |      |
| lect2b_DV106130 | (201) | AGCAAGCAGAACAGACCATGTGCATAAGGGCATTGACATCGTGTGTAAACG |      |
|                 |       | 251                                                 | 300  |
| lect2a_BT059281 | (249) | ATGGGGCCACAGTGTACGCTCCATTTGATGTGAAACTCAATGGGAAAGTG  |      |
| lect2b_DV106130 | (251) | ACGGGGCCACAGTGTACGCTCCATTTGACGTGAAACTCAACGGCAAGTG   |      |
|                 |       | 301                                                 | 350  |
| lect2a_BT059281 | (299) | ATCGTGTACACAGACCCGAAGAAGGCAGCCATCAATGATGGGATCAACCT  |      |
| lect2b_DV106130 | (301) | ACAGTGTACACAAACCAAGAAAGCAGCCATCAACGATGGGATCAACCT    |      |
|                 |       | 351                                                 | 400  |
| lect2a_BT059281 | (349) | CAGTGGAGAGGGTCTGTGCTTTAAGCTGTTCTACGTAAGCCTGACAGT    |      |
| lect2b_DV106130 | (351) | CAGTGGGGAAGGTCTGTGCTTTAAGCTGTTCTACGTGAAGCCTGACAGTT  |      |
|                 |       | 401                                                 | 450  |
| lect2a_BT059281 | (399) | ACTCTGGGGTGGTGAAGAAGGGCCAGAGGATTGGGACCCTGCTGACCATG  |      |
| lect2b_DV106130 | (401) | ACTCTGGGGTGGTGAAGAAGGGCCAGAGGATTGGGACCCTGCTCCCATG   |      |
|                 |       | 451                                                 | 500  |
| lect2a_BT059281 | (449) | CAAAGTGTCTACCCAGGGATCACTTCTCACGTCCACGTCCAGATGTGTGA  |      |
| lect2b_DV106130 | (451) | CAGAGTGTCTACCCAGGGATCACTTCTCACGTCCACGTCCAGATGTGTGA  |      |
|                 |       | 501                                                 | 550  |
| lect2a_BT059281 | (499) | CAAGTCTGACCCACCAAGTTTCTTAATGGAATCCCTTTGGCCTCTCC     |      |
| lect2b_DV106130 | (501) | CAAGTCTGACCCACCAAGTACCTTCTGATTGA-----TTGG---TTAA    |      |
|                 |       | 551                                                 | 600  |
| lect2a_BT059281 | (549) | ATCAATCAATCAATCAATCAATCAATCAATCAATCAATCAATCAATCAAT  |      |
| lect2b_DV106130 | (541) | ATAAATCATCTAAATTATCAC-CAATG-----                    |      |
|                 |       | 601                                                 | 650  |
| lect2a_BT059281 | (599) | CAATCAATCAATCAATCAATCAATCAATCAATCAATCAATCTACAAAATG  |      |
| lect2b_DV106130 | (567) | -----                                               |      |
|                 |       | 651                                                 | 700  |
| lect2a_BT059281 | (649) | ATTGTAATCATTGGCCAATAGATGGGCTTACTGTGTTTAAAAATAATAAT  |      |
| lect2b_DV106130 | (567) | -----                                               |      |
|                 |       | 701                                                 | 750  |
| lect2a_BT059281 | (699) | TTGCTTATTATAATAAACATTTTTTTATTACAGTATAAAATACATAAAAGT |      |
| lect2b_DV106130 | (567) | -----                                               |      |
|                 |       | 751                                                 | 800  |
| lect2a_BT059281 | (749) | TGCACACTTCTGGAATAAAGTTTTAACCCTTTAAGCATCAACAGGGGTAA  |      |
| lect2b_DV106130 | (567) | -----                                               |      |
|                 |       | 801                                                 | 850  |
| lect2a_BT059281 | (799) | TTCATAATTTCAAAAACCTTTTTTTTATCCTTTTATGCAACTAGTTACAG  |      |
| lect2b_DV106130 | (567) | -----                                               |      |
|                 |       | 851                                                 | 900  |
| lect2a_BT059281 | (849) | ACATGAAAATAATTTACAATGATTTCTGTGTTAATATATAATTTCTGTGG  |      |
| lect2b_DV106130 | (567) | -----                                               |      |
|                 |       | 901                                                 | 950  |
| lect2a_BT059281 | (899) | TATATATATATATATATATATATATATATATATATATATATATATATATA  |      |
| lect2b_DV106130 | (567) | -----                                               |      |
|                 |       | 951                                                 | 1000 |

|                 |        |                                                      |      |
|-----------------|--------|------------------------------------------------------|------|
| lect2a_BT059281 | (949)  | TAAAAATCTCTTTTTTGTGTACTAGTTTTACGTGGCTAATCTGACAATGTG  |      |
| lect2b_DV106130 | (567)  | -----                                                |      |
|                 |        | 1001                                                 | 1050 |
| lect2a_BT059281 | (999)  | GACTCAATAGTAACTTTGAAAAAACATAGATTTAAACAAATACACGT      |      |
| lect2b_DV106130 | (567)  | -----                                                |      |
|                 |        | 1051                                                 | 1100 |
| lect2a_BT059281 | (1049) | GTCAAGGCTGTGGGTAAGTGGTGAAAGGAGTCAGGCGCAGGAGAGCTGAG   |      |
| lect2b_DV106130 | (567)  | -----                                                |      |
|                 |        | 1101                                                 | 1150 |
| lect2a_BT059281 | (1099) | ATGCGTGGACAAGGTATTTAATACAAGAAAACATCAGTATGAACACAATA   |      |
| lect2b_DV106130 | (567)  | -----                                                |      |
|                 |        | 1151                                                 | 1200 |
| lect2a_BT059281 | (1149) | CTATGGTGTCTGGAAAAAACGGTACCACGAAATTAACAGGCGTAATAAA    |      |
| lect2b_DV106130 | (567)  | -----                                                |      |
|                 |        | 1201                                                 | 1250 |
| lect2a_BT059281 | (1199) | AAAACCCGGTAACAATATACCAGCCGTCAGATACAGCCTTACAATAAAAC   |      |
| lect2b_DV106130 | (567)  | -----                                                |      |
|                 |        | 1251                                                 | 1300 |
| lect2a_BT059281 | (1249) | AAAGACGCACACAAACATCGGGGAAACCAGAGGGTTAAATAATGAACATG   |      |
| lect2b_DV106130 | (567)  | -----                                                |      |
|                 |        | 1301                                                 | 1350 |
| lect2a_BT059281 | (1299) | TAATGGGGGAATTGAAACCAGGTGTGTAAAAAACAACAACAAACAAAT     |      |
| lect2b_DV106130 | (567)  | -----                                                |      |
|                 |        | 1351                                                 | 1400 |
| lect2a_BT059281 | (1349) | GGAAAATGAAAAGTGGATCGGTGATGGCTACCGCCGAATGCCGCTCGAAC   |      |
| lect2b_DV106130 | (567)  | -----                                                |      |
|                 |        | 1401                                                 | 1450 |
| lect2a_BT059281 | (1399) | AAGGAGCGGGACCGACTCCGGCGGAAGTCGTGACAACATGTGTGTCATTG   |      |
| lect2b_DV106130 | (567)  | -----                                                |      |
|                 |        | 1451                                                 | 1500 |
| lect2a_BT059281 | (1449) | AACAACCCCATACCATGACTAGATGGTGGAAAAAACACCCATCTCTTTA    |      |
| lect2b_DV106130 | (567)  | -----                                                |      |
|                 |        | 1501                                                 | 1550 |
| lect2a_BT059281 | (1499) | ATAAGTTCTTTAGACAATTAAAGCTAATTTACCAACATTTCTGAAAATTT   |      |
| lect2b_DV106130 | (567)  | -----                                                |      |
|                 |        | 1551                                                 | 1600 |
| lect2a_BT059281 | (1549) | GGAATGAAACTTCTATTGATAAAAAATACTGTTTAAAACATGAAAAACAT   |      |
| lect2b_DV106130 | (567)  | -----                                                |      |
|                 |        | 1601                                                 | 1650 |
| lect2a_BT059281 | (1599) | ACTAAAATGTATATTTTTTAAACATGAAATTTGACTATAAATGTGTGAAAA  |      |
| lect2b_DV106130 | (567)  | -----                                                |      |
|                 |        | 1651                                                 | 1700 |
| lect2a_BT059281 | (1649) | TTTAAATATATATGCATATTTTGGGGAATTTAATAAAAAGAAAAAGTGTTAC |      |
| lect2b_DV106130 | (567)  | -----                                                |      |
|                 |        | 1701                                                 | 1750 |
| lect2a_BT059281 | (1699) | TGTTTGACAGAAAATGCCATTTTGCCATTATTTCCAATTTGGGGTTAAAA   |      |
| lect2b_DV106130 | (567)  | -----                                                |      |
|                 |        | 1751                                                 | 1800 |
| lect2a_BT059281 | (1749) | TGACCCATGTTGATGCATTTAGGGGTCAAATATGTTGGTCCTTTTGGGG    |      |
| lect2b_DV106130 | (567)  | -----                                                |      |
|                 |        | 1801                                                 | 1850 |
| lect2a_BT059281 | (1799) | TATTAACAACAAAATAAATACATCATAAATCATTCCTAATAAATAATGTG   |      |
| lect2b_DV106130 | (567)  | -----                                                |      |
|                 |        | 1851                                                 | 1900 |
| lect2a_BT059281 | (1849) | TATTTTGTAAAAAAAAAAAAAAAAAAAAAAAAAAAAAAAAAAAAAAAAA    |      |
| lect2b_DV106130 | (567)  | -----                                                |      |
|                 |        | 1901                                                 | 1914 |

```
lect2a_BT059281 (1899) AAAAAAAAAAAAAAGA
lect2b_DV106130 (567) -----
```

**Figure S3.** Alignment of the nucleotide sequences of *lect2a* (GenBank accession number BT059281) and *lect2b* (GenBank accession number DV106130). Conserved regions are highlighted in yellow. Alignments were performed using AlignX (Vector NTI Advance 11). Forward primers are bolded and underlined, whereas reverse primers are bolded without an underline.

|                 |        |                                          |                                                  |                 |
|-----------------|--------|------------------------------------------|--------------------------------------------------|-----------------|
|                 |        | 654                                      |                                                  | 703             |
| helz2a_BT072427 | (651)  | CCTGAAGCCTTCATCCCCCTTGTGACCCATAAAACCTGAA | CAGATTGTTT                                       |                 |
| helz2b_EG928625 | (199)  | CCTCAGGCCCTCATCCCACTGGTCAGCAACAAACCAGAA  | AGATTGTGTT                                       |                 |
|                 |        | 704                                      |                                                  | 753             |
| helz2a_BT072427 | (701)  | ACTCGGCGATCACAAACAATTGCAGCCCATCAGCAG     | TGATCTT-TC                                       |                 |
| Helz2b_EG928625 | (249)  | GCTCGGTGACCACAAACAACCTACGTCCCATCATCAAG   | AATGAACTTGTGA                                    |                 |
|                 |        | 754                                      |                                                  | 803             |
| helz2a_BT072427 | (750)  | GCAAGGTTGGGTATGAGGAA                     | TCTCTGTTTGAGCGTTACATGGAA                         | ---             |
| Helz2b_EG928625 | (299)  | GGAAAG-TTGGGGATGTCAAA                    | TCTCTGTTTGAGCGCTACTTTGAA                         | CGCCG           |
|                 |        | 804                                      |                                                  | 853             |
| helz2a_BT072427 | (796)  | -----AGGCGT                              | TGATGCTGGATACGCAGTACAGAATGCATGAGCGCAT            | TTT             |
| helz2b_EG928625 | (348)  | GTCCCAGACAG                              | TGATGCTGGATACCAGTACAGAATGCATGAAGATATAT           |                 |
|                 |        | 854                                      |                                                  | 903             |
| helz2a_BT072427 | (841)  | GTGAGTTTCCTTCAAAGGAGTTC                  | TACAAACGGTATTCTCAAGACTGGAGCA                     |                 |
| helz2b_EG928625 | (398)  | GCAAGTTCCATCAGAGGAGTAT                   | TATGAGGAAGAACTGAAGACTGACGTG                      |                 |
|                 |        | 904                                      |                                                  | 953             |
| helz2a_BT072427 | (891)  | ACTCCGAAAG                               | ACAGTGTCTTGTCTCGCTCAGTCTCATCAT-CTGACGCCA         |                 |
| helz2b_EG928625 | (448)  | GATCGCCCAATG                             | GTGTCTTTCAGGCTGA-----CAGCAGGCAGACGCCA            |                 |
|                 |        | 954                                      |                                                  | 1003            |
| helz2a_BT072427 | (940)  | TCCTTTTTGGACACGT                         | TTCCGGAAGAGATCAGTCTTGTGGTCTCCACC                 |                 |
| helz2b_EG928625 | (494)  | TTGTTTTTCGGCAACGT                        | CAGTGGAGAAGAGGTCAGCCTGGTTGTGAGCACA               |                 |
|                 |        | 1004                                     |                                                  | 1053            |
| helz2a_BT072427 | (990)  | GAA                                      | CGGGGAATGAAAACTCAAAAGGCCAACTCGGCAGAGGCTGAGGAATC  |                 |
| helz2b_EG928625 | (544)  | GAA                                      | AAAAGGAATGAAAACTCAAAAGCGAATATGAAGGAGAGAGACCGTAGT |                 |
|                 |        | 1054                                     |                                                  | 1103            |
| helz2a_BT072427 | (1040) | GGTTCGCATCGCC                            | TCTCTGTGATCAAAATGCTGGGGTGGCGGCTAGCG              |                 |
| helz2b_EG928625 | (594)  | GGTTCGGATCGCC                            | AACCAAGCTGGTGACAGAATCCAAATATAAA-CACAG            |                 |
|                 |        | 1104                                     |                                                  | 1153            |
| helz2a_BT072427 | (1090) | AC-ATAGCTATTCT                           | GACGCCATACAATGCCAGGTAGCCAAAGGTAAACGA             |                 |
| helz2b_EG928625 | (643)  | AGTATGGCGATCT                            | ATCTCCCTACAATGCCAGGTGGCCGAAATTAAGAA              |                 |
|                 |        | 1154                                     |                                                  | 1203            |
| helz2a_BT072427 | (1139) | AACCCTGTTAA                              | TGAAGCATATCCAGAACGTCAACGTGAATACCATCACAA          |                 |
| helz2b_EG928625 | (693)  | AGAACTGAGAA                              | AATTAAAACTGGACGAATCAACGGTCAACCATCACAA            |                 |
|                 |        | 1204                                     |                                                  | 1253            |
| helz2a_BT072427 | (1189) | AGAGTCAAGGAAGTGAATGGCGT                  | TATGTCATCTTGTCCTACTGTGCGCTCT                     |                 |
| helz2b_EG928625 | (743)  | AAAGTCAAGGAAGTGAATGGCGC                  | TATGTCATCTTGTCCTACTGTGCGCTCT                     |                 |
|                 |        | 1254                                     |                                                  | 1303            |
| helz2a_BT072427 | (1239) | TGTCCCAAGTCGGA                           | AATTGACACAGAGCCCTACCAAAGCATGGCTCACCAA            |                 |
| helz2b_EG928625 | (793)  | TTA                                      | CCCAAGCAAGGATCGAGACAGAGCCGGACAGGCTGGTTGTCCAA     |                 |
|                 |        | 1304                                     |                                                  | 1327            |
| helz2a_BT072427 | (1289) | GAA                                      | AGCTTGGT                                         | TTTGTTCATGGACCC |
| helz2b_EG928625 | (843)  | ACA                                      | TGTGGCTTTGTTCGT                                  | GACCC           |

**Figure S4.** Alignment of the nucleotide sequences of *helz2a* (GenBank accession number BT072427) and *helz2b* (GenBank accession number EG928625). Conserved regions are highlighted in yellow. Alignments were performed using AlignX (Vector NTI Advance 11). Forward primers are bolded and underlined, whereas reverse primers are bolded without an underline.
